1 **Dissecting transcriptomic signatures of genotype x genotype interactions during**  
2 **the initiation of plant-rhizobium symbiosis**

3

4 Camilla Fagorzi<sup>1</sup>, Giovanni Bacci<sup>1,\*</sup>, Rui Huang<sup>2</sup>, Lisa Cangioli<sup>1</sup>, Alice Checcucci<sup>1,†</sup>, Margherita  
5 Fini<sup>1</sup>, Elena Perrin<sup>1</sup>, Chiara Natali<sup>1</sup>, George Colin diCenzo<sup>2</sup>, Alessio Mengoni<sup>1,\*</sup>

6

7 1, Dipartimento di Biologia, University of Florence, Florence, Italy

8 2, Department of Biology, Queen's University, Kingston, Ontario, Canada

9 \* Corresponding author ([giovanni.bacci@unifi.it](mailto:giovanni.bacci@unifi.it); [alessio.mengoni@unifi.it](mailto:alessio.mengoni@unifi.it) )

10 †, present address, Department of Agricultural and Food Science, University of Bologna, Bologna,  
11 Italy

12

13 **Running title:** Transcriptome variability in rhizobium symbiosis

14 **Abstract**

15

16 Rhizobia are ecologically important, facultative plant symbiotic microbes. In nature there exists  
17 large variability in the association of rhizobial strains and host plant of the same species. Here, we  
18 evaluated whether plant and rhizobial genotypes influence the initial transcriptional response of  
19 rhizobium following perception of host plant. RNA-sequencing of the model rhizobium  
20 *Sinorhizobium meliloti* exposed to root exudates or luteolin was performed in a combination of  
21 three *S. meliloti* strains and three *Medicago sativa* varieties. The response to root exudates involved  
22 hundreds of changes in the rhizobium transcriptome. Of the differentially expressed genes,  
23 expression of 35% were influenced by strain genotype, 16% by the plant genotype, and 29% by  
24 strain x host plant genotype interactions. We also examined the response of a hybrid *S. meliloti*  
25 strain, in which the symbiotic megaplasmid (~ 20% of the genome) was mobilized between two of  
26 the above-mentioned strains. Dozens of genes resulted up-regulated in the hybrid strain, indicative  
27 of nonadditive variation in the transcriptome. In conclusion, this study demonstrated that  
28 transcriptional responses of rhizobia upon perception of legumes is influenced by the genotypes of  
29 both symbiotic partners, and their interaction, suggesting a wide genetic spectrum of partner choice  
30 selection in plant-rhizobium symbiosis.

31

32

## 33 Introduction

34 Microbes play a crucial role in the biology and evolution of their eukaryotic hosts [1]. Among other  
35 activities, microbes contribute to the host's acquisition of nutrients [2], functioning of the host's  
36 immune system [3], and protection of the host from predation [4]. The rules governing host-microbe  
37 interactions remain a topic of intense investigation. In many cases, the eukaryotic host selectively  
38 recruits the desired microbial partner; squid light organs are selectively colonized by *Vibrio*  
39 symbionts [5], legumes select for effective symbionts by sanctioning non-effective symbionts [6],  
40 and the crop microbiome is cultivar-dependent [7, 8]. The genetic basis determining the quality of a  
41 microbial symbiont and its ability to effectively colonize its eukaryotic partner is generally not well-  
42 understood, but high-throughput genome sequencing projects of host-associated microbes and  
43 complete microbiomes are shedding light on this topic [9–12]. In the case of plants, such studies  
44 have observed an enrichment of certain gene functions in plant-associated microbes, such as genes  
45 related to carbohydrate metabolism, secretion systems, phytohormone production, and phosphorous  
46 solubilization [11–14].

47 The rhizobia are an ecologically important exemplar of facultative host-associated microbes.  
48 These soil-dwelling bacteria are able to colonize plants and enter into an endosymbiotic association  
49 with plants of the family *Fabaceae* [15]. This developmentally complex process begins with an  
50 exchange of signals between the free-living organisms [16], which leads to invasion of the plant by  
51 the rhizobia [17], and culminates in the formation of a new organ (a nodule) in which the plant cells  
52 are intra-cellularly colonized by N<sub>2</sub>-fixing rhizobia [18, 19]. Decades of research have identified an  
53 intricate network of coordinated gene functions required to establish a successful mutualistic  
54 interaction between rhizobia and legumes [19–21]. In contrast to the core symbiotic machinery,  
55 most of which has been elucidated, much remains unknown about the accessory genes required to  
56 optimize the interaction.

57 In addition to simple gene presence/absence, genotype by genotype (GxG) interactions have  
58 prominent impacts on symbiotic outcome [22]. The importance of both the plant and bacterial  
59 genotypes, and their interaction, in optimizing symbioses between rhizobia and legumes was  
60 recognized in early population genetic studies [23–25]. More recently, greenhouse studies have  
61 directly demonstrated the influence GxG interactions on the fitness of both the plant and rhizobium  
62 partners [26–29]. The newly developed select-and-resequence approach is providing a high-  
63 throughput approach to begin uncovering the genetic basis underlying GxG interactions on fitness  
64 in rhizobium – legume symbioses, as well as a way to screen for strain-specific effects of individual  
65 genes [30, 31]. To date, GxG interaction studies have largely focused on measurements of fitness as  
66 a holistic measure of the entire symbiotic process. Nodule formation is a complex developmental  
67 process involving several steps that each require a distinct molecular toolkit [32], and in principle,  
68 distinct GxG interactions could be acting at each of these developmental stages. Transcriptomic  
69 studies have demonstrated that GxG interactions have significant impacts on the gene expression  
70 patterns of both partners in mature N<sub>2</sub>-fixing nodules [33, 34]. However, we are unaware of studies  
71 specifically focusing on the role of GxG interactions in early developmental stages, such as during  
72 the initial perception of the partners by each other. Such knowledge is critical not only to fully  
73 understand the microevolution of host-associated bacteria, but also to develop improved rhizobium  
74 bioinoculants able to outcompete the indigenous rhizobium population [35, 36].

75 Here, we evaluated whether GxG interactions could be identified in the initial transcriptional  
76 response of rhizobium perception of a host plant. We worked with *Sinorhizobium meliloti*, which is  
77 one of the best studied models for GxG interactions in rhizobia. *S. meliloti* forms N<sub>2</sub>-fixing nodules  
78 on plants belonging to the tribe *Trigonelleae* [37] that includes *Medicago sativa* (alfalfa), a major  
79 forage crop grown worldwide for which many varieties have been developed [38]. The *S. meliloti*  
80 genome comprises three main replicons, a chromosome, a chromid, and a megaplasmid; the latter  
81 one harbours most of the essential symbiotic functions, including the genes responsible for the  
82 initial molecular dialogue with the host plant (*nod* genes) [39, 40]. To address our aim, the gene

83 expression patterns of three strains of *S. meliloti* (each with distinct symbiotic properties) following  
84 four hours of exposure to root exudates derived from three *M. sativa* varieties were characterized  
85 using RNA-sequencing. Additionally, the relevance of the megaplasmid in defining the strain-  
86 specific transcriptional responses was analysed through studying a hybrid *S. meliloti* strain, in  
87 which the native megaplasmid was replaced with that of another wild type strain. The results  
88 demonstrated that the transcriptional response involved genes on all three replicons and that, even  
89 among conserved *S. meliloti* genes, transcriptional patterns were both strain and root exudate  
90 specific.

91

## 92 **Materials and Methods**

### 93 **Strains and microbiological methods**

94 The list of strains, and their host plant of origin, is reported in **Table S1**. *S. meliloti* Rm1021 is a  
95 spontaneous streptomycin-resistant derivative of the isolate SU47 recovered from *M. sativa* root  
96 nodules [41]. *S. meliloti* BL225C was isolated by plant trapping with the *M. sativa* variety “Lodi” in  
97 Lodi, Italy in 1996 [24]. *S. meliloti* AK83 strain was isolated from nodules of *M. falcata* grown in  
98 soil samples from the North Aral Sea region in Kazakhstan in 2001 [42]. *S. meliloti* BM806 (later  
99 termed as “hybrid strain”) is a Rm2011 (a near identical strain to Rm1021, as both are independent  
100 streptomycin resistant derivatives of the nodule isolate *S. meliloti* SU47 [43]) derivative in which  
101 the pSymA megaplasmid was replaced with the homologous megaplasmid (pSINMEB01) from  
102 strain BL225C [44]. Strains were grown at 30°C in TY with 0.2 g/l CaCl<sub>2</sub>, or in M9 supplemented  
103 with 0.2% succinate as the carbon source. For Rm1021, streptomycin (200 µg/mL) was added to the  
104 culture medium during routine growth.

105

### 106 **Plant varieties, root adhesion tests, and symbiotic assays**

107 Three plant varieties were used (**Table S1**), differing in fall dormancy and in genotype. Fall  
108 dormancy (FD) is an important trait having large impacts on the productivity and persistence of  
109 alfalfa [45]. Cultivars Camporegio and Verbena are included in the subgroup of fall dormant type  
110 (FDT; FD 1–4), while cultivar Lodi is a semi-dormant type (SDT; FD 5–7). Symbiotic assays were  
111 performed, as previously reported [46], on 12 plants per strain – cultivar combination. The root  
112 adhesion test was performed five days following the inoculum of plantlets. Using sterile tweezers,  
113 plantlets were carefully removed from the substrate and divided into epicotyl and hypocotyl (i.e.  
114 root) portions. After measuring their length, roots were washed to remove loosely adherent cells by  
115 vortexing for ten seconds in 500 µl of 0.9% NaCl. Then, roots were transferred to 500 µl of fresh  
116 0.9% NaCl, and vortexed for 30 seconds to collect bacterial cells strongly adhered to the root  
117 surface. Roots were removed from the tube and the quantity of bacterial cells detached from the  
118 roots and recovered in the NaCl solution was evaluated using Real Time PCR (qPCR) by a standard  
119 curve method on the *nodB* gene in a QuantStudio™ 7 flex (Applied Biosystems), as previously  
120 described [47, 48]. Differences were evaluated by one-way ANOVA Tukey pairwise contrast and  
121 using the Scott-Knott procedure as implemented in R [49].

122

### 123 **Root exudate production and metabolomic analyses**

124 Root exudates were produced as previously reported [50] in two independent experiments, giving  
125 two biological replicas for each plant cultivar. A blank sample was prepared with the same setup of  
126 the plant experiment, but without adding the plantlet. Elemental analysis (CHNS) was performed on  
127 crude root exudates (a combined sample for each cultivar) using a carbon hydrogen and nitrogen  
128 analyzer (CHN-S Flash E1112, ThermoFinnigan, San José, California, United States). For LC-MS,  
129 the extraction of the seven samples (two biological replicates per cultivar, plus the blank) was  
130 performed by metaSysX GmbH ([www.metasyx.com](http://www.metasyx.com)) with a modified protocol from [51]. The  
131 samples were measured with a Waters ACQUITY Reversed Phase Ultra Performance Liquid  
132 Chromatography (RP-UPLC) coupled to a Thermo-Fisher Q-Exactive mass spectrometer that  
133 consists of an ElectroSpray Ionization source (ESI) and an Orbitrap mass analyzer (UPLC-MS). A

134 C18 column was used for the chromatographic separation of the hydrophilic compounds. The mass  
135 spectra were acquired in full scan MS positive and negative modes (Mass Range [100–1500]).  
136 Extraction of the LC-MS data was accomplished with the software REFINER MS® 10.5  
137 (GeneData, [genedata.com](http://genedata.com)). After extraction of the peak list from the chromatograms, data were  
138 processed, aligned, and filtered using in-house software. Only those features (peak IDs) that were  
139 present in at least two out of the seven samples were kept. At this stage, an average retention time  
140 (RT) and average m/z values were given to each feature. The alignment was performed for each  
141 platform independently (polar phase positive mode, polar phase negative mode). The annotation of  
142 the content of the sample was accomplished by matching the extracted data from the  
143 chromatograms with metaSysX's library of reference compounds. Data from both platforms (RP-  
144 UPLC and UPLC-MS) were combined to build the final data matrix. Attribution of brute formulas  
145 to known compound was done using the PubChem database ([pubchem.ncbi.nlm.nih.gov/](http://pubchem.ncbi.nlm.nih.gov/)). Principal  
146 Component Analysis (PCA) was performed on the Bray-Curtis dissimilarity obtained from each  
147 peak ID value. Statistical differences in single metabolites were assessed by Simper analysis based  
148 on the decomposition of the Bray-Curtis dissimilarity obtained from each peak ID value. All  
149 statistical analyses were done with the vegan package of R [52].  
150

### 151 RNA isolation

152 Overnight cultures of *S. meliloti*, grown in M9-succinate medium at 30°C at 130 rpm, were diluted  
153 to an OD<sub>600</sub> of 0.05 in 5 ml of M9-succinate and incubated until an OD<sub>600</sub> of 0.4 was reached. Then,  
154 either 10 µM of luteolin (Sigma-Aldrich) or one of the alfalfa root exudate (normalized by the total  
155 organic carbon as measured by the CHNS analysis; 0.250 ml, 0.042 ml, 0.224 ml, and 0.806 ml for  
156 Camporegio, Lodi, Verbena, and the blank samples, respectively) was added to each of the cultures  
157 and incubated for a additional 4 hours at 30°C with shaking at 130 rpm. Biological replicates were  
158 performed for each of the three strains across the five conditions. After incubation, cells were  
159 blocked with RNAprotect Bacteria (Qiagen, Venlo, The Netherlands) and total RNA was extracted  
160 using RNeasy Mini kits (Qiagen) from 0.5 ml of culture following the manufacturer's instructions,  
161 including on column DNase I treatment. After elution, a second DNase I (ThermoFisher, Waltham,  
162 Massachusetts, USA) treatment was performed. The absence of contaminant DNA was verified by  
163 qPCR on the *nodC* gene of *S. meliloti*. Quality and quantity of extracted RNA were checked by  
164 spectrophometric readings (NanoQuant plate, Infinite PRO 200, Tecan, Männedorf, Switzerland),  
165 fluorometric measurement (Qubit, ThermoFisher), and cartridge electrophoresis on a 2100  
166 Bioanalyzer (Agilent RNA Nano kit 6000, Agilent Technology, Santa Clara, California, USA). All  
167 RNA samples gave RNA Integrity Number (RIN) values between 9 and 10.  
168

### 169 Reverse transcriptase qPCR

170 Single stranded cDNA libraries were prepared from total RNA samples using SuperScript II reverse  
171 transcriptase (ThermoFisher) following the manufacturer's instructions. qPCR was performed using  
172 a QuantStudio™ 7 flex (Applied Biosystems, Foster City, California, USA) programmed with the  
173 following temperature profile: 2 min at 94°C, followed by 40 cycles composed of 15 s at 94°C, 15 s  
174 at 60°C, and 30 s at 72°C, with a final melting curve to check for product specificity. Technical  
175 triplicate were carried-out as described in [48]. Gene *smc01804* (*rplM*), encoding the 50S ribosomal  
176 protein L13, was used as a housekeeping gene for normalization of the expression data. The list of  
177 primers used is reported in **Table S2**. Relative quantification (RQ, as  $2^{-\Delta\Delta Ct}$ ) values were  
178 calculated with the ExpressionSuite ver. 1.0.4 software (Applied Biosystems). Differences on RQ  
179 data were evaluated by one-way ANOVA with Tukey pairwise contrast in R [49].  
180

### 181 RNA-sequencing and data analysis

182 Ribosomal RNA depletion was performed using MICROBexpress kits (ThermoFisher) following  
183 the manufacturer's instruction starting from 0.6-1 µg of total RNA per sample. Removal of rRNA  
184 was checked on a Bioanalyzer 2100 (Agilent RNA Nano kit 6000, Agilent Technology). Ribosomal



185 RNA depleted RNA preparations were used for library construction with TruSeq Stranded Total  
186 RNA Library Prep Gold kit (Illumina, San Diego, California, USA), using SuperScript II reverse  
187 transcriptase (ThermoFisher) for cDNA preparation. Libraries were assessed for quality using a  
188 DNA 1000 chip on a Bioanalyzer 2100 (Agilent Technologies), running 1  $\mu$ l of each undiluted  
189 DNA library. Library normalization was performed based on Qubit fluorometric quantification.  
190 Libraries were sequenced on an Illumina Novaseq 6000 apparatus with a SP flow cell.

191

### 192 **Read mapping, counting, and differential expression analysis**

193 Reads were demultiplexed using “bcl2fastq2” version 2.2 with default parameters. Demultiplexed  
194 sequences were then quality controlled using the StreamingTrim algorithm (version 1.0) [53] with a  
195 quality threshold of 20 Phred. Reads were mapped back to transcripts using Salmon (version 1.1.0)  
196 [54] against *decoy-aware* datasets containing both cDNA and the genome of each strain (as  
197 described in Salmon documentation: [https://salmon.readthedocs.io/en/latest/salmon.html#preparing-](https://salmon.readthedocs.io/en/latest/salmon.html#preparing-transcriptome-indices-mapping-based-mode)  
198 [transcriptome-indices-mapping-based-mode](https://salmon.readthedocs.io/en/latest/salmon.html#preparing-transcriptome-indices-mapping-based-mode)). Quantification files produced by Salmon were then  
199 imported into R using tximport package (version 1.10.1) [55]. Differential abundance analysis was  
200 performed with DESeq2 package (version 1.22.2) [56] on single strains in different conditions. To  
201 analyze all strains together, transcripts were collapsed into orthologous groups with Roary [57],  
202 version 3.11.2 (for additional details see the subchapter below). Counts produced by Salmon were  
203 collapsed following the group ID provided by Roary, producing a single table with ortholog-level  
204 quantification of transcripts. The produced table was then used to perform nested likelihood ratio  
205 test (LRT) with DESeq2. Strains and conditions were used together with their interaction to build a  
206 model for each group. Terms were then removed one by one to test their impact on the likelihood of  
207 the full model (as described in the DESeq2 documentation:  
208 [http://bioconductor.org/packages/devel/bioc/vignettes/DESeq2/inst/doc/DESeq2.html#likelihood-](http://bioconductor.org/packages/devel/bioc/vignettes/DESeq2/inst/doc/DESeq2.html#likelihood-ratio-test)  
209 [ratio-test](http://bioconductor.org/packages/devel/bioc/vignettes/DESeq2/inst/doc/DESeq2.html#likelihood-ratio-test)).

210

### 211 **Statistical analysis of differentially expressed genes**

212 For each *S. meliloti* strain, genes differentially expressed ( $\log_2[\text{fold change}] \geq 1$ ,  $p\text{-value} < 0.01$ ) in  
213 at least one condition (exposure to luteolin, or *M. sativa* Camporegio, Verbena, or Lodi root  
214 exudate) relative to the control condition were identified, and all fold change values (relative to the  
215 control) for these genes were extracted. Heatmaps of the differentially expressed genes (DEGs)  
216 were prepared for each strain using the *ComplexHeatmap* and *Heatmaply* packages of R [58, 59].

217 To compare expression of genes conserved between Rm1021, AK83, and BL225C, the  
218 pangenome of the three strains was calculated using Roary ver. 3.13.0 [57] with an identity  
219 threshold of 90%, and the genes found in all three strains (the core genes) were recorded. For each  
220 condition, core genes differentially expressed in at least one strain relative to the control condition  
221 were identified, and the fold change values for the gene and its orthologs in the other strains were  
222 extracted. Heatmaps of the differentially expressed genes (DEGs) were prepared for each strain  
223 using the *ComplexHeatmap* and *Heatmaply* packages of R. In addition, all fold change values for all  
224 of the core *S. meliloti* genes were extracted and used to run a PCA using the *prcomp* function of R  
225 that was visualized with the *ggplot2* package of R [60]. The same approach was used to compare  
226 expression of core genes across Rm1021, BL225C, and the hybrid strain.

227 All genes of *S. meliloti* strains Rm1021, AK83, and BL225C were functionally annotated  
228 using the standalone ver. 2 of eggNOG-mapper [61, 62] using default settings with the following  
229 two modifications: mode was set to diamond and query-cover was set to 20. Next, the Kyoto  
230 Encyclopedia of Genes and Genomes (KEGG) module annotations for each gene were extracted; if  
231 a gene was annotated with multiple KEGG modules, only the first one was kept. Then, for each  
232 strain-condition pairing, KEGG modules that were over- or under-represented among the up- and  
233 down-regulated genes (relative to the whole genome) were identified using hypergeometric tests ( $p$ -  
234 value  $< 0.05$ ) with a custom R script. The same procedure was used to identify Cluster of

235 Orthologous Genes (COG) categories that were over- or under-represented among the up- and  
236 down-regulated genes.

237 All data processing was performed using custom Python scripts using Python ver. 3.6.9 and  
238 the external libraries Pandas ver. 0.23.4 [63], pickle ver. 4.0, and numpy ver. 1.15.4 [64].

239 For each DEG, nested likelihood ratio tests (LRT) was used to evaluate the statistical  
240 significance of strain, condition (luteolin and treatments with root exudates from the three cultivar)  
241 and strain x condition interaction effects on gene expression. Implementation of nested LRT was  
242 performed as in [34], using a custom R script.

243

#### 244 **Data availability**

245 Gene expression data are available at GEO under the accession: Custom scripts developed for this  
246 work can be found in the GitHub repository: [https://github.com/hyhy8181994/Sinorhizobium-](https://github.com/hyhy8181994/Sinorhizobium-RNAseq-2020)  
247 [RNAseq-2020](https://github.com/hyhy8181994/Sinorhizobium-RNAseq-2020).

248

249

## 250 **Results**

### 251 **Symbiotic phenotypes differ across rhizobial strain x plant variety combinations**

252 Symbiotic phenotypes (plant growth, nodule number) and root adhesion of *S. meliloti* strains  
253 Rm1021, BL225C, and AK83 were measured during interaction with three varieties of alfalfa  
254 (Camporegio, Verbena, Lodi). The results indicated that these phenotypes are influenced by both  
255 the plant and the bacterial genotypes (**Figure 1, Supplemental file S1**). Root adhesion phenotypes  
256 (**Figure 1a**) were divided by Scott-Knott test into three main groups reflecting high, medium, and  
257 low root colonization. Interestingly, each group was heterogenous with respect to both plant variety  
258 and *S. meliloti* strain, consistent with a specificity of plant variety (i.e. genotype “sensu lato”) and  
259 strain individuality (i.e. strain genotype) pairs in root colonization efficiency. For instance, *S.*  
260 *meliloti* BL225C strongly colonized the roots of the Camporegio and Verbena varieties, but it  
261 displayed much weaker colonization of the Lodi cultivar. On the other hand, *S. meliloti* AK83  
262 colonized the Lodi and Camporegio varieties better than the Verbena cultivar. Nodules per plant, as  
263 well as measures of symbiotic efficiency (epicotyl length and the shoot dry weight), showed  
264 differences among the strain-variety combinations (**Figure 1b-d**). However, the extents of the  
265 variation were lower than those recorded for plant root adhesion. The highest number of nodules  
266 was found on the Lodi variety nodulated by *S. meliloti* AK83, which was previously interpreted as a  
267 consequence of its reduced N<sub>2</sub>-fixation ability with some alfalfa varieties [42, 48, 65]. Interestingly,  
268 the measures of symbiotic efficiency did not correlate with root adhesion phenotypes (both  
269 adhesion vs. dry weight and adhesion vs. epicotyl length gave not significant value of Pearson  
270 correlation,  $p > 0.18$ ). For example, the largest plants were the Lodi variety inoculated with *S.*  
271 *meliloti* BL225C despite the root adhesion of this combination being the lowest. Similarly, the  
272 smallest plants were the Verbena variety inoculated with *S. meliloti* Rm1021 despite strong root  
273 adhesion in this pairing.

274

### 275 **Root exudates differ among alfalfa varieties**

276 LC-MS analysis of the alfalfa root exudates detected a total of 2688 unique features, including 392  
277 annotated features, across the two platforms; 1514 hydrophilic features were detected in UPLC-MS  
278 positive mode (PP) (288 annotated), and 1174 hydrophilic features were detected in UPLC-MS  
279 negative mode (PN) (104 annotated) (**Table S3**). In order to clarify if the metabolite composition of  
280 the root exudates from the alfalfa cultivars differed, Principal Component Analysis (PCA) was  
281 performed on the two biological replicates of the three cultivars (**Figure 2, Supplemental File S2**).  
282 The three cultivars clearly grouped separately from each other, suggesting the presence of a large  
283 number of differences in their metabolic compositions. Most of the observed differences were  
284 related to amino acids, in particular N-Acetyl-L-leucine, Tryptophan, Cytosine, 3,5-  
285 Dihydroxyphenylglycine, and the dipeptide Val-Ala (**Table S4**). Multiple flavones and flavonoids,  
286 which include known inducers of NodD activation [66] and of chemotaxis [67], were potentially  
287 identified. These include a peak hypothetically attributed to apigenidin (PP\_23300) that was found  
288 in the Verbena and Camporegio root exudates, liquiritigenin (PP\_23583) that was found in the  
289 Camporegio and Lodi root exudates, as well as apigenin (PP\_25608) and genistein (PP\_14051) that  
290 were found in variable amounts in the root exudates from all three cultivars. Elemental analysis  
291 (CHNS) of root exudates was also performed (**Table S5**), and the results were used to normalize the  
292 quantity of root exudate used in the treatment of *S. meliloti* strains, based on equalizing the amount  
293 of total organic carbon (TOC) added to each culture.

294

### 295 **The number of differentially expressed genes changes in strains x conditions combinations**

296 The global transcriptional responses of the three *S. meliloti* wild type strains following a four-hour  
297 exposure to luteolin or alfalfa root exudate was evaluated using RNA-sequencing. In addition, a  
298 fourth strain (BM806, referred to as “hybrid” for simplicity) was included [46]; results for this  
299 strain will be discussed below. The list of differentially expressed genes (DEGs) for each strain and



300 condition (luteolin and the root exudates of the three plant varieties) against the control (blank  
301 sample) is reported in **Table S6**. DEGs were considered to be biologically significant if they had a  $\geq$   
302 2-fold change in expression and an adjusted  $p$ -value  $< 0.01$ . The numbers of DEGs are shown in  
303 **Tables 1** and **S7**. RT-qPCR on a panel of seven DEGs validated the reliability of the RNA-seq data  
304 (**Table S8**).

305 In general, luteolin treatment resulted in the lowest number of DEGs, ranging from 36 to 149 per  
306 strains. Concerning the root exudates, the number of DEGs was influenced by both the strain and  
307 the alfalfa cultivar. Overall, the Camporegio and Verbena root exudates induced more gene  
308 expression changes than the Lodi root exudate. Cluster analyses of all genes that were differentially  
309 expressed in at least one condition (fold change  $\geq 2$ , adjusted  $p$ -value  $< 0.01$ ) revealed that, for each  
310 strain, the transcriptional responses to the Verbena and Camporegio root exudates were similar, and  
311 grouped separately from that of the Lodi cultivar (**Figure 3**; interactive versions are provided in  
312 **Supplemental File S1**). Notably, the metabolite composition of the Camporegio and Verbena root  
313 exudates were similar along the second principal component (**Figure 2**), suggesting that compounds  
314 determining the second principal component of variance may play an important role in modulating  
315 *S. meliloti* gene expression. Interestingly,  $\sim 80\%$  of the genes upregulated by root exudates were  
316 found on the chromosomes of the three strains, whereas  $\sim 77\%$  of the downregulated genes were  
317 found on the pSymA and pSymB replicons (**Table S7**). This is consistent with a previous signature-  
318 tagged mutagenesis study reporting that 80% of genes required for rhizosphere colonization are  
319 chromosomally located in *S. meliloti* Rm1021 [68].

320 In all conditions, *S. meliloti* BL225C displayed the largest number of DEGs (with up to 20% of  
321 genes differentially expressed), while *S. meliloti* AK83 had the fewest. Comparison of the *S.*  
322 *meliloti* Rm1021 data to the NodD3 regulon established elsewhere [69] indicated that 105, 104, and  
323 4 of the DEGs observed in response to the Verbena, Camporegio, and Lodi root exudates,  
324 respectively, belong to the NodD3 regulon. However, some of these genes showed contrasting  
325 patterns of expression, suggesting the root exudates may also contain antagonistic molecules that  
326 repress the *nod* regulon, as previously reported [66, 70]. As the genes overlapping the NodD3  
327 regulon account for  $\sim 20\%$  or less of the DEGs in each condition, it is likely that most of the  
328 observed DEGs belong to *nod*-independent regulons. The majority of DEGs ( $> 75\%$ ) had orthologs  
329 in all three of the tested strains (**Table S9**), although expression patterns were not necessarily  
330 conserved (**Figure 4**). Interestingly,  $\geq 90\%$  of genes upregulated in response to root exudate  
331 exposure belonged to the core genome of the three *S. meliloti* strains (**Table S6**), suggesting that the  
332 large majority of genes required for alfalfa rhizosphere colonization are highly conserved.

333 Nested likelihood ratio tests indicated that up to 29% of the conserved genes were influenced by  
334 strain x condition interactions, consistent with an important role of GxG interactions in the initiation  
335 of rhizobium – legume symbioses (**Table 2**). Moreover, the same analysis emphasized the role of  
336 strain genotype in the response to common condition (35% of associated DEGs). Indeed, such  
337 strain-by-strain variability on the conserved gene set was also highlighted by the cluster analyses,  
338 which indicated that, for each root exudate, the transcriptional responses of *S. meliloti* Rm1021 and  
339 AK83 were more similar and grouped separately from that of BL225C (**Figure 4**). Notably, these  
340 results do not reflect the genomic relatedness of these strains as Rm1021 and BL225C group  
341 together phylogenetically [71].

### 342 343 **Stimulons differ in the set of elicited functions**

344 Functional enrichment analyses, based on KEGG modules and COG categories, were performed to  
345 give a global overview of the functions of the DEGs (**Supplemental File S2**). Strain and condition  
346 specific patterns of functional enrichment were observed, consistent with a functional  
347 differentiation of the stimulons of each experiment. Nevertheless, a core set of COG categories  
348 were commonly over- or under-represented in all three *S. meliloti* strains during exposure to the  
349 Camporegio or Verbena root exudates. These included an enrichment among the up-regulated genes  
350 of COG categories J and O related to protein expression and modification, suggesting that the root

351 exudates stimulated a major remodelling of the proteome. In addition, the COG category G  
352 (carbohydrate transport and metabolism) was under-represented among the up-regulated genes  
353 while the COG category C (energy production and conversion) was over-represented among the  
354 down-regulated genes. This observation suggests that the root exudates stimulated a global change  
355 in the cellular energy production pathways versus growth in our standard minimal medium with  
356 succinate as the sole carbon source.

357 Among the mostly highly expressed genes in *S. meliloti* Rm1021 during exposure to the Verbena  
358 and Camporegio root exudates were *smc03024* and *smc03028*, encoding components of the flagellar  
359 apparatus (*flgF* and *flgC*, respectively); the orthologs of these genes were not induced in BL225C  
360 nor AK83. The induction of motility is in contrast the observation that luteolin alone decreases the  
361 motility of *S. meliloti* Rm1021 strain [69, 72]. Presumably, this reflects the presence of additional  
362 stimuli in the root exudates. Indeed, amino acids present in root exudates are known to stimulate  
363 chemiotactic behaviour in *S. meliloti* [73] and a signature tagged mutagenesis showed that motility-  
364 related genes are relevant during competition for rhizosphere colonization in *S. meliloti* Rm1021  
365 [68].

366 Differences in the transcriptomes of two *Bradyrhizobium diazoefficiens* strains exposed to root  
367 exudates were suggested to be related to differences in their competitive abilities [74]. We therefore  
368 examined the expression patterns of several genes likely to play a role in competition for  
369 rhizosphere colonization and root adhesion. It was previously suggested that the *sin* quorum sensing  
370 system is involved in competition in *S. meliloti* [75]; in our data, *sinI* (*smc00168*) was repressed in  
371 *S. meliloti* Rm1021 in the presence of the Camporegio and Verbena root exudates, but no changes  
372 in the expression of the orthologous genes in strains AK83 or BL225C were observed. No evidence  
373 was found in any of the strains for changes in expression of galactoglucan or succinoglucan  
374 biosynthesis genes, such as *wgaA* (*sm\_b21319*) and *wgeA* (*sm\_b21314*). The Verbena and  
375 Camporegio root exudates induced expression of the rhizobactin transport gene (*sma2337* [*rhtX*]) of  
376 Rm1021 and BL225C; this gene is not found in AK83. This may be a consequence of the root  
377 exudates chelating the available iron [76], consequently eliciting siderophore production that can  
378 inhibit growth of strains lacking siderophores [77]. Plasmid pSINME01 of *S. meliloti* AK83  
379 exhibits similarity with the plasmid pHRC017 from *S. meliloti* C017, which confers a competitive  
380 advantage for nodule occupancy and host range restrictions [78]. Considering that a few of the  
381 genes on the plasmids pSINME01 and pSINME02 were differentially expressed upon exposure to  
382 root exudates, it is possible that the accessory plasmids of strain AK83 also contribute to  
383 competition for rhizosphere colonization [78].

384 Differences in gene expression patterns across conditions may be related, in part, to differences in  
385 the presence of flavonoids. For example, the *emrAB* systems (*smc03167* and *smc03168*) is known to  
386 be induced by luteolin and apigenin [79]. Here, these genes were induced by luteolin and the  
387 Camporegio and Verbena root extracts that putatively contained apigenin, but they were not  
388 induced by the Lodi root extract that lacked apigenin.

389

### 390 **Mobilization of the symbiotic megaplasmid results in nonadditive changes in stimulons**

391 To evaluate the impact of inter-replicon epistatic interactions on the transcriptional response of *S.*  
392 *meliloti* to alfalfa root exudates, we used RNA-seq to characterize the response of a *S. meliloti*  
393 hybrid strain, containing the chromosome and pSymB of strain Rm2011 and the symbiotic  
394 megaplasmid (pSINMEB01) of strain BL225C [46]. Cluster analyses clearly demonstrated that the  
395 transcriptome of the hybrid strain differed from both the BL225C and Rm1021 wild type strains in  
396 all conditions (**Figure 5**). Of particular interest were the results observed during exposure to the  
397 Lodi root exudate. We previously showed that alfalfa cv. Lodi plants inoculated with the hybrid  
398 strain were larger than those inoculated with either BL225C or Rm1021 [44]. Here, we observed  
399 that exposure to Lodi root exudate results in more differentially expressed genes in the hybrid strain  
400 (98 genes) than in either Rm1021 or BL225C (32 and 76 genes, respectively; **Table 1**). In  
401 particular, a cluster of genes was specifically upregulated in the hybrid strain, and the majority of

402 these genes were located on the symbiotic megaplasmid. The presence of these nonadditive  
403 transcriptional changes may reflect a loss of regulation of these megaplasmid genes by  
404 chromosomal regulators [80, 81], providing a potential molecular mechanism underlying the  
405 improved symbiotic phenotype of the hybrid compared to both wild type strains.  
406

407

## 408 Discussion

409 Rhizobium-legume interactions are complex multistep phenomena, that begin with an exchange of  
410 signals between two partners [16, 82]. The rhizobia initially detect the plant through perception of  
411 flavonoids in the root exudate of legumes by NodD proteins, which then triggers the production of  
412 lipochitooligosaccharide molecules known as Nod factors. Nod factors are then recognized by  
413 specific LysM receptor kinase proteins in plant root cells, triggering the symbiosis signalling  
414 pathway and initiating the formation of a nodule. However, root exudates contain a mixture of  
415 flavonoids, some of them having different agonistic activity on NodD [66]. Root exudates also  
416 contain many other molecules that can serve as signals or support rhizobium metabolism, such as  
417 amino acids and sugars, that may influence the ability of rhizobia to successfully colonize the  
418 rhizosphere and be in a position to enter into the symbiosis [83, 84]. Consequently, interactions  
419 between plant and rhizobium genotypes are expected to influence the success of the initial  
420 interaction between the two partners.

421 Previous works have identified a clear role for GxG interactions in the partnership between *S.*  
422 *meliloti* and *M. truncatula* [85], demonstrating that aerial biomass was influenced by the plant and  
423 rhizobium genotypes as well as by their interaction. Here, we demonstrated that GxG interactions  
424 also have a significant impact on the adherence of *S. meliloti* strains to alfalfa roots, as a  
425 representative phenotype for an early stage of the interaction between these partners. Rhizosphere  
426 colonization appears to have a direct impact on nodule colonization [68, 86]; while our data does  
427 not address if root adhesion is correlated with competition for nodule occupancy in mixed  
428 inoculums, it does suggest that root adhesion is poorly correlated with overall symbiotic efficiency  
429 in single-inoculum studies. Previous studies have also demonstrated an influence of GxG  
430 interactions on the nodule transcriptome of *Medicago* – *Sinorhizobium* symbioses [33, 34]. Here,  
431 we showed that GxG interactions similarly have an important contribution in determining the  
432 transcriptional response of *S. meliloti* to detection of *M. sativa* root exudates. Together, these results  
433 demonstrate that GxG interactions have a meaningful impact on the outcome of rhizobium – legume  
434 symbioses at multiple stages of development.

435 Exposure of *B. diazoefficiens* to soybean root exudates resulted in changes in expression of  
436 450 genes, representing nearly 5.6% of the genome, and the impact of soybean root exudate differed  
437 between the two tested *B. diazoefficiens* strains [74]. Similarly, between 0.5% and 20% of *S.*  
438 *meliloti* genes were differentially expressed following exposure to alfalfa root exudate, depending  
439 on the host – symbiont combination. The similarities/differences in response of the three *S. meliloti*  
440 strains to treatments did not appear to depend the phylogenetic relatedness of the strains [71],  
441 although this cannot be definitively concluded without analysis of additional strains. Nevertheless,  
442 these results emphasize the importance of transcriptional rewiring during strain diversification in  
443 bacteria [81]. Similarly, studies with eukaryotic organisms indicate that adaptation has an important  
444 role in differentiating the gene expression patterns of organisms [87, 88].

445 The root exudate stimulons only partially overlapped with the stimulons of luteolin, a known  
446 inducer of NodD in *S. meliloti* [66], confirming that alfalfa root exudates contain numerous  
447 molecular signals aside from flavonoids that may influence the competitiveness of various  
448 rhizobium strains. Importantly, the transcriptional patterns induced by alfalfa root exudates differed  
449 depending on the cultivar from which they were collected; whether these differences are adaptive  
450 requires further investigation. Additionally, there was a clear relationship between the differences in  
451 the *S. meliloti* gene expression profiles and the overall chemical similarity of the root exudates as  
452 measured with LC-MS; the Camporegio and Verbena root exudates induced similar gene expression  
453 changes, while also being similar along the second principal component of variance (accounting for  
454 30% of the variance) in the PCA of the root exudate composition. In future work, it would be  
455 interesting to define which compounds in the root exudates have the greatest impact on the *S.*  
456 *meliloti* transcriptome.

457 In addition to the impact of GxG interactions on rhizobium – legume symbioses, there is a potential

458 for inter-replicon interactions within rhizobium genomes to further influence the symbiosis. Indeed,  
459 inter-replicon epistatic interactions are abundant in the *S. meliloti* genome [89]. To address the  
460 contribution of inter-replicon interactions on symbiosis, we examined a hybrid strain in which the  
461 symbiotic megaplasmid of *S. meliloti* Rm2011 (a near identical strain to Rm1021 [43]) was  
462 replaced with the symbiotic megaplasmid of *S. meliloti* BL225C. Non-additive effects on the  
463 transcriptional profiles associated with all three replicons were observed in the hybrid strain relative  
464 to Rm1021 and BL225C, indicating that megaplasmid mobilization induced a global rewiring of  
465 gene expression likely due to transcriptional cross-talk among the replicons [81, 90]. Similarly, non-  
466 additive effects on the transcriptome of plant hybrids have been extensively explored [91] and  
467 demonstrated as one of the basis for heterosis in crops [92]. The results with the hybrid lead us to  
468 hypothesize that the large symbiotic variability observed in natural *S. meliloti* isolates may partly be  
469 related to genome-wide transcriptome changes following large-scale horizontal gene transfer  
470 followed by natural selection. If true, however, this would limit our ability to predict the  
471 competitiveness of rhizobium isolates from their genome sequence.

472 In conclusion, this study demonstrated that the initial perception of legumes by rhizobia leads to  
473 hundreds of changes in the rhizobium transcriptome, and that these changes are dependent on the  
474 plant genotype, the rhizobium genotype, and genotype x genotype interactions. These results  
475 complement past studies demonstrating a role of GxG interactions in determining the transcriptome  
476 of both the legume and rhizobium partners in mature N<sub>2</sub>-fixing nodules [33, 34]. The majority of  
477 genes up-regulated in response to alfalfa root exudates were conserved in all three strains,  
478 supporting the hypothesis that the *S. meliloti* lineage was adapted to rhizosphere colonization before  
479 gaining the genes required for symbiotic nitrogen fixation [68]. Additionally, the transcriptional  
480 response to perception of alfalfa root exudate involved genes from all three of the *S. meliloti*  
481 replicons, and seemingly involved non-additive effects resulting from inter-replicon interactions.

## 482 **Acknowledgments**

483 We are grateful to Gabriele Brazzini for technical assistance in setting up the root adhesion test.  
484 This work was supported by Fondazione Cassa di Risparmio di Firenze, grant n. 18204, 2017.0719,  
485 by “MICRO4Legumes” grant (Italian Ministry of Agriculture) and by the grant as “Dipartimento di  
486 Eccellenza 2018-2022” by the Italian Ministry of Education, University and Research (MIUR). LC  
487 was supported by a fellowship from MICRO4Legumes (Italian Ministry of Agriculture). Work in  
488 the GCD laboratory is supported by funding from Queen’s University and the Natural Sciences and  
489 Engineering Research Council of Canada.

## 491 **Conflict of Interest**

492 The authors declare no conflict of interest.

## 493 **References**

- 494 1. Rosenberg E, Zilber-Rosenberg I. Microbes Drive Evolution of Animals and Plants: the  
495 Hologenome Concept. *MBio* 2016; **7**: e01395-15-.
- 496 2. Mus F, Crook MB, Garcia K, Costas AG, Geddes BA, Kouri ED, et al. Symbiotic nitrogen  
497 fixation and the challenges to its extension to nonlegumes. *Appl Environ Microbiol* . 2016. ,  
498 **82**
- 499 3. Lee YK, Mazmanian SK. Has the Microbiota Played a Critical Role in the Evolution of the  
500 Adaptive Immune System? *Science (80- )* 2010; **330**: 1768 LP – 1773.
- 501 4. Jones BW, Nishiguchi MK. Counterillumination in the Hawaiian bobtail squid, *Euprymna*  
502 *scolopes* Berry (Mollusca: Cephalopoda). *Mar Biol* 2004; **144**: 1151–1155.
- 503 5. Nyholm S V, McFall-Ngai M. The winnowing: establishing the squid–vibrio symbiosis. *Nat*  
504



- 506 *Rev Microbiol* 2004; **2**: 632–642.
- 507 6. Kiers ET, Rousseau RA, West SA, Denison RF. Host sanctions and the legume – rhizobium  
508 mutualism. *Nature* 2003; **425**: 1095–1098.
- 509 7. Mwafulirwa L, Baggs EM, Russell J, George T, Morley N, Sim A, et al. Barley genotype  
510 influences stabilization of rhizodeposition-derived C and soil organic matter mineralization.  
511 *Soil Biol Biochem* 2016; **95**: 60–69.
- 512 8. Escudero-Martinez C, Bulgarelli D. Tracing the evolutionary routes of plant–microbiota  
513 interactions. *Curr Opin Microbiol* 2019; **49**: 34–40.
- 514 9. Pasolli E, Asnicar F, Manara S, Quince C, Huttenhower C, Correspondence NS, et al.  
515 Extensive Unexplored Human Microbiome Diversity Revealed by Over 150,000 Genomes  
516 from Metagenomes Spanning Age, Geography, and Lifestyle. *Cell* 2019; **176**: 1–14.
- 517 10. Singh BK, Liu H. Eco-holobiont□: A new concept to identify drivers of host-associated  
518 microorganisms. 2019; **00**.
- 519 11. de Souza RSC, Armanhi JSL, Damasceno N de B, Imperial J, Arruda P. Genome Sequences  
520 of a Plant Beneficial Synthetic Bacterial Community Reveal Genetic Features for Successful  
521 Plant Colonization. *Front Microbiol* 2019; **10**.
- 522 12. Levy A, Gonzalez IS, Mittelviehhaus M, Clingenpeel S, Paredes SH, Miao J, et al. Genomic  
523 features of bacterial adaptation to plants. *Nat Genet* 2018; **50**: 138–150.
- 524 13. Pini F, Galardini M, Bazzicalupo M, Mengoni A. Plant-Bacteria Association and Symbiosis:  
525 Are There Common Genomic Traits in Alphaproteobacteria? *Genes (Basel)* 2011; **2**: 1017–  
526 1032.
- 527 14. Guttman D, McHardy AC, Schulze-Lefert P. Microbial genome-enabled insights into plant–  
528 microorganism interactions. *Nat Rev Genet* 2014; **15**: 797–813.
- 529 15. Poole P, Ramachandran V, Terpolilli J. Rhizobia: from saprophytes to endosymbionts. *Nat*  
530 *Publ Gr* 2018.
- 531 16. Oldroyd GED. Speak, friend, and enter: signalling systems that promote beneficial symbiotic  
532 associations in plants. *Nat Rev Microbiol* 2013; **11**: 252–63.
- 533 17. Gage DJ. Infection and Invasion of Roots by Symbiotic , Nitrogen-Fixing Rhizobia during  
534 Nodulation of Temperate Legumes. *Society* 2004; **68**: 280–300.
- 535 18. Udvardi M, Poole PS. Transport and metabolism in legume-rhizobia symbioses. *Annu Rev*  
536 *Plant Biol* 2013; **64**: 781–805.
- 537 19. Kereszt A, Mergaert P, Kondorosi E. Bacteroid development in legume nodules: Evolution  
538 of mutual benefit or of sacrificial victims? *Mol Plant-Microbe Interact* 2011; **24**: 1300–1309.
- 539 20. Benezech C, Doudement M, Gourion B. Legumes tolerance to rhizobia is not always  
540 observed and not always deserved. *Cell Microbiol* 2019; 1–9.
- 541 21. Gibson KE, Kobayashi H, Walker GC. Molecular Determinants of a Symbiotic Chronic  
542 Infection. *Annu Rev Genet* 2008; **42**: 413–441.
- 543 22. Burghardt LT. Evolving together, evolving apart: measuring the fitness of rhizobial bacteria  
544 in and out of symbiosis with leguminous plants. *New Phytol* 2019.
- 545 23. Paffetti D, Scotti C, Gnocchi S, Fancelli S. Genetic Diversity of an Italian Rhizobium  
546 meliloti Population from Different Medicago sativa Varieties. *Appl Environ Microbiol* 1996;



- 547           **62**: 2279–2285.
- 548   24.   Carelli M, Gnocchi S, Fancelli S, Mengoni A, Paffetti D, Scotti C, et al. Genetic diversity  
549   and dynamics of *Sinorhizobium meliloti* populations nodulating different alfalfa cultivars in  
550   Italian soils. *Appl Environ Microbiol* 2000; **66**.
- 551   25.   Rangin C, Brunel B, Perrineau M, Béna G. Effects of *Medicago truncatula* genetic diversity,  
552   rhizobial competition and strain effectiveness on the diversity of a natural *Sinorhizobium*  
553   spp. community. *Appl Environ Microbiol* 2008; **74**: 5653–5661.
- 554   26.   Heath KD, Tiffin P. Context dependence in the coevolution of plant and rhizobial mutualists.  
555   *Proc R Soc B Biol Sci* 2007; **274**: 1905–1912.
- 556   27.   Heath KD, Tiffin P. Stabilizing mechanisms in a legume-rhizobium mutualism. *Evolution (N*  
557   *Y)* 2009; **63**: 652–662.
- 558   28.   Heath KD. Intergenomic epistasis and coevolutionary constraint in plants and rhizobia.  
559   *Evolution (N Y)* 2010; **64**: 1446–1458.
- 560   29.   Ehinger M, Mohr TJ, Starcevich JB, Sachs JL, Porter SS, Simms EL. Specialization-  
561   generalization trade-off in a *Bradyrhizobium* symbiosis with wild legume hosts. *BMC Ecol*  
562   2014; **14**.
- 563   30.   Burghardt LT, Epstein B, Guhlin J, Nelson MS, Taylor MR, Young ND, et al. Select and  
564   resequence reveals relative fitness of bacteria in symbiotic and free-living environments.  
565   *Proc Natl Acad Sci* 2018; **115**: 2425–2430.
- 566   31.   Burghardt LT, Trujillo DI, Epstein B, Tiffin P, Young ND. A Select and Resequencing  
567   Approach Reveals Strain-Specific Effects of *Medicago* Nodule-Specific PLAT-Domain  
568   Genes. *Plant Physiol* 2020; **182**: 463–471.
- 569   32.   Roux B, Rodde N, Jardinaud MF, Timmers T, Sauviac L, Cottret L, et al. An integrated  
570   analysis of plant and bacterial gene expression in symbiotic root nodules using laser-capture  
571   microdissection coupled to RNA sequencing. *Plant J* 2014; **77**: 817–837.
- 572   33.   Heath KD, Burke PV, Stinchombe JR. Coevolutionary genetic variation in the legume-  
573   rhizobium transcriptome. *Mol Ecol* 2012; **19**: 4735–4747.
- 574   34.   Burghardt LT, Guhlin J, Chun CL, Liu J, Sadowsky MJ, Stupar RM, et al. Transcriptomic  
575   basis of genome by genome variation in a legume-rhizobia mutualism. *Mol Ecol* 2017; **26**:  
576   6122–6135.
- 577   35.   Triplett EW, Sadowsky MJ. Genetics of competition for nodulation of legumes. *Annu Rev*  
578   *Microbiol* 1992; **46**: 399–422.
- 579   36.   Checcucci A, DiCenzo GC, Bazzicalupo M, Mengoni A. Trade, diplomacy, and warfare: The  
580   Quest for elite rhizobia inoculant strains. *Front Microbiol* 2017; **8**.
- 581   37.   Sprent JI, Ardley J, James EK. Biogeography of nodulated legumes and their nitrogen-fixing  
582   symbionts. *New Phytol* 2017; **215**: 40–56.
- 583   38.   Frame J, Charlton JFL, Laidlaw AS. Temperate forage legumes. 1998. Cab International,  
584   Wallingford, UK.
- 585   39.   Galibert F, Finan TM, Long SR, Puhler A, Abola P, Ampe F, et al. The composite genome of  
586   the legume symbiont *Sinorhizobium meliloti*. *Science (80- )* 2001; **293**: 668–672.
- 587   40.   Harrison PW, Lower RPJ, Kim NKD, Young JPW. Introducing the bacterial ‘chromid’: Not

- 588 a chromosome, not a plasmid. *Trends Microbiol* 2010; **18**: 141–148.
- 589 41. Meade HM, Long SR, Ruvkun GB, Brown SE, Ausubel FM. Physical and genetic  
590 characterization of symbiotic and auxotrophic mutants of *Rhizobium meliloti* induced by  
591 transposon Tn5 mutagenesis. *J Bacteriol* 1982; **149**: 114 LP – 122.
- 592 42. Galardini M, Mengoni A, Brilli M, Pini F, Fioravanti A, Lucas S, et al. Exploring the  
593 symbiotic pangenome of the nitrogen-fixing bacterium *Sinorhizobium meliloti*. *BMC*  
594 *Genomics* 2011; **12**: 235.
- 595 43. Meade HM, Signer ER. Genetic mapping of *Rhizobium meliloti*. *Proc Natl Acad Sci* 1977;  
596 **74**: 2076–2078.
- 597 44. Checcucci A, Dicenzo GC, Ghini V, Bazzicalupo M, Becker A, Decorosi F, et al. Creation  
598 and Characterization of a Genomically Hybrid Strain in the Nitrogen-Fixing Symbiotic  
599 Bacterium *Sinorhizobium meliloti*. *ACS Synth Biol* 2018; **7**: 2365–2378.
- 600 45. Teuber LR, Taggard KL, Gibbs LK, McCaslin MH, Peterson MA, Barnes DK. Fall  
601 dormancy. *Stand. tests to Charact. alfalfa Cultiv. CC Fox) p. A-1.(North Am. Alfalfa Improv.*  
602 *Conf. Beltsville, MD)*. 1998.
- 603 46. Checcucci A, diCenzo G, Ghini V, Bazzicalupo M, Becker A, Decorosi F, et al. Creation and  
604 characterization of a genomically hybrid strain in the nitrogen-fixing symbiotic bacterium  
605 *Sinorhizobium meliloti*. *ACS Synth Biol* 2018.
- 606 47. Trabelsi D, Pini F, Aouani ME, Bazzicalupo M, Mengoni A. Development of real-time PCR  
607 assay for detection and quantification of *Sinorhizobium meliloti* in soil and plant tissue. *Lett*  
608 *Appl Microbiol* 2009; **48**: 355–361.
- 609 48. Checcucci A, Azzarello E, Bazzicalupo M, Galardini M, Lagomarsino A, Mancuso S, et al.  
610 Mixed nodule infection in *Sinorhizobium meliloti*-*medicago sativa* symbiosis suggest the  
611 presence of cheating behavior. *Front Plant Sci* 2016; **7**.
- 612 49. R Development Core Team. R: A language and environment for statistical computing. R  
613 Foundation for Statistical Computing, Vienna, Austria. ISBN 3-900051-07-0, URL  
614 <http://www.R-project.org/>. *R Found Stat Comput Vienna, Austria* 2012.
- 615 50. Checcucci A, Azzarello E, Bazzicalupo M, Carlo AD, Emiliani G, Mancuso S, et al. Role  
616 and regulation of ACC deaminase gene in *Sinorhizobium meliloti*: Is it a symbiotic,  
617 rhizospheric or endophytic gene? *Front Genet* 2017; **8**.
- 618 51. Giavalisco P, Kohler K, Hummel J, Seiwert B, Willmitzer L. <sup>13</sup>C isotope-labeled  
619 metabolomes allowing for improved compound annotation and relative quantification in  
620 liquid chromatography-mass spectrometry-based metabolomic research. *Anal Chem* 2009;  
621 **81**: 6546–6551.
- 622 52. Oksanen J, Blanchet F, Kindt R, Legendre P, Minchin P, O'Hara R, et al. vegan: Community  
623 Ecology Package. R package version 2.0-10. *R Packag version* . 2013. , **1**:  
624 10.4135/9781412971874.n145
- 625 53. Bacci G, Bazzicalupo M, Benedetti A, Mengoni A. StreamingTrim 1.0: A Java software for  
626 dynamic trimming of 16S rRNA sequence data from metagenetic studies. *Mol Ecol Resour*  
627 2014; **14**.
- 628 54. Patro R, Duggal G, Love MI, Irizarry RA, Kingsford C. Salmon provides fast and bias-aware  
629 quantification of transcript expression. *Nat Methods* 2017; **14**: 417–419.
- 630 55. Sonesson C, Love MI, Robinson MD. Differential analyses for RNA-seq: transcript-level

- 631 estimates improve gene-level inferences. *F1000Research* 2015; **4**.
- 632 56. Love MI, Huber W, Anders S. Moderated estimation of fold change and dispersion for RNA-  
633 seq data with DESeq2. *Genome Biol* 2014; **15**: 550.
- 634 57. Page AJ, Cummins CA, Hunt M, Wong VK, Reuter S, Holden MTG, et al. Roary: Rapid  
635 large-scale prokaryote pan genome analysis. *Bioinformatics* 2015; **31**: 3691–3693.
- 636 58. Gu Z, Eils R, Schlesner M. Complex heatmaps reveal patterns and correlations in  
637 multidimensional genomic data. *Bioinformatics* 2016; **32**: 2847–2849.
- 638 59. Galili T, O’Callaghan A, Sidi J, Sievert C. heatmaply: an R package for creating interactive  
639 cluster heatmaps for online publishing. *Bioinformatics* 2018; **34**: 1600–1602.
- 640 60. Wickham Hadley. ggplot2: Elegant Graphics for Data Analysis. 2009. Springer-Verlag New  
641 York.
- 642 61. Huerta-Cepas J, Szklarczyk D, Heller D, Hernández-Plaza A, Forslund SK, Cook H, et al.  
643 eggNOG 5.0: a hierarchical, functionally and phylogenetically annotated orthology resource  
644 based on 5090 organisms and 2502 viruses. *Nucleic Acids Res* 2019; **47**: D309–D314.
- 645 62. Huerta-Cepas J, Forslund K, Coelho LP, Szklarczyk D, Jensen LJ, Von Mering C, et al. Fast  
646 genome-wide functional annotation through orthology assignment by eggNOG-mapper. *Mol*  
647 *Biol Evol* 2017; **34**: 2115–2122.
- 648 63. Reback J, McKinney W, jbrockmendel, Bossche J Van den, Augspurger T, Cloud P, et al.  
649 pandas-dev/pandas: Pandas 1.0.3. 2020.
- 650 64. Oliphant TE. A guide to NumPy. 2006. Trelgol Publishing USA.
- 651 65. Biondi EG, Tatti E, Comparini D, Giuntini E, Mocali S, Giovannetti L, et al. Metabolic  
652 Capacity of Sinorhizobium ( Ensifer ) meliloti Strains as Determined by Phenotype  
653 MicroArray Analysis □ †. *Society* 2009; **75**: 5396–5404.
- 654 66. Peck MC, Fisher RF, Long SR. Diverse Flavonoids Stimulate NodD1 Binding to nod Gene  
655 Promoters in Sinorhizobium meliloti. *J Bacteriol* 2006; **188**: 5417–5427.
- 656 67. Caetano-Anollés G, Crist-Estes DK, Bauer WD. Chemotaxis of Rhizobium meliloti to the  
657 plant flavone luteolin requires functional nodulation genes. *J Bacteriol* 1988; **170**: 3164 LP –  
658 3169.
- 659 68. Salas ME, Lozano MJ, López JL, Draghi WO, Serrania J, Torres Tejerizo GA, et al.  
660 Specificity traits consistent with legume-rhizobia coevolution displayed by Ensifer meliloti  
661 rhizosphere colonization. *Environ Microbiol* 2017; **19**: 3423–3438.
- 662 69. Barnett MJ, Long SR. The Sinorhizobium meliloti SyrM regulon: effects on global gene  
663 expression are mediated by syrA and nodD3. *J Bacteriol* 2015; **197**: 1792–1806.
- 664 70. Zuanazzi JAS, Clergeot PH, Quirion J-C, Husson H-P, Kondorosi A, Ratet P. Production of  
665 Sinorhizobium meliloti nod gene activator and repressor flavonoids from Medicago sativa  
666 roots. *Mol plant-microbe Interact* 1998; **11**: 784–794.
- 667 71. Galardini M, Pini F, Bazzicalupo M, Biondi EG, Mengoni A. Replicon-dependent bacterial  
668 genome evolution: The case of Sinorhizobium meliloti. *Genome Biol Evol* 2013; **5**: 542–558.
- 669 72. Spini G, Decorosi F, Cerboneschi M, Tegli S, Mengoni A, Viti C, et al. Effect of the plant  
670 flavonoid luteolin on Ensifer meliloti 3001 phenotypic responses. *Plant Soil* 2016; **399**.
- 671 73. Webb BA, Helm RF, Scharf BE. Contribution of individual chemoreceptors to

- 672 Sinorhizobium meliloti chemotaxis towards amino acids of host and nonhost seed exudates.  
673 *Mol Plant-Microbe Interact* 2016; **29**: 231–239.
- 674 74. Liu Y, Jiang X, Guan D, Zhou W, Ma M, Zhao B, et al. Transcriptional analysis of genes  
675 involved in competitive nodulation in Bradyrhizobium diazoefficiens at the presence of  
676 soybean root exudates. *Sci Rep* 2017; **7**: 10946.
- 677 75. McIntosh M, Krol E, Becker A. Competitive and cooperative effects in quorum-sensing-  
678 regulated galactoglucan biosynthesis in Sinorhizobium meliloti. *J Bacteriol* 2008; **190**:  
679 5308–5317.
- 680 76. Parker DR, Reichman SM, Crowley DE. Metal Chelation in the Rhizosphere. *Roots Soil*  
681 *Manag Interact between Roots Soil* . 2005. , 57–93
- 682 77. diCenzo GC, MacLean AM, Milunovic B, Golding GB, Finan TM. Examination of  
683 Prokaryotic Multipartite Genome Evolution through Experimental Genome Reduction. *PLoS*  
684 *Genet* 2014; **10**.
- 685 78. Crook MB, Lindsay DP, Biggs MB, Bentley JS, Price JC, Clement SC, et al. Rhizobial  
686 Plasmids That Cause Impaired Symbiotic Nitrogen Fixation and Enhanced Host Invasion.  
687 *Mol Plant-Microbe Interact* 2012; **25**: 1026–1033.
- 688 79. Rossbach S, Kunze K, Albert S, Zehner S, Göttfert M. The Sinorhizobium meliloti EmrAB  
689 efflux system is regulated by flavonoids through a TetR-like regulator (EmrR). *Mol Plant-*  
690 *Microbe Interact* 2014; **27**: 379–387.
- 691 80. Ramos JL, Marqués S, Timmis KN. Transcriptipnal control of the Pseudomonas TOL  
692 plasmid catabolic operons is achieved through an interplay of host factors and plasmid-  
693 encoded regulators. *Annu Rev Microbiol* 1997; **51**: 341–373.
- 694 81. Galardini M, Brilli M, Spini G, Rossi M, Roncaglia B, Bani A, et al. Evolution of Intra-  
695 specific Regulatory Networks in a Multipartite Bacterial Genome. *PLoS Comput Biol* 2015;  
696 **11**: e1004478.
- 697 82. Oldroyd GED, Murray JD, Poole PS, Downie JA. The Rules of Engagement in the Legume-  
698 Rhizobial Symbiosis. *Annu Rev Genet* 2011; **45**: 119–144.
- 699 83. Barbour WM, Hattermann DR, Stacey G. Chemotaxis of Bradyrhizobium japonicum to  
700 soybean exudates. *Appl Environ Microbiol* 1991; **57**: 2635–2639.
- 701 84. Webb BA, Compton KK, Martin JS, Taylor D, Sobrado P, Scharf BE. Sinorhizobium  
702 meliloti Chemotaxis to Multiple Amino Acids Is Mediated by the Chemoreceptor McpU.  
703 *Mol Plant Microbe Interact* 2017; **30**: 770–777.
- 704 85. Mhadhbi H, Jebara M, Limam F, Huguet T, Aouani ME. Interaction between Medicago  
705 truncatula lines and Sinorhizobium meliloti strains for symbiotic efficiency and nodule  
706 antioxidant activities. *Physiol Plant* 2005; **124**: 4–11.
- 707 86. Entcheva P, Phillips DA, Streit WR. Functional analysis of Sinorhizobium meliloti genes  
708 involved in biotin synthesis and transport. *Appl Environ Microbiol* 2002; **68**: 2843–2848.
- 709 87. López-Maury L, Marguerat S, Bähler J. Tuning gene expression to changing environments:  
710 from rapid responses to evolutionary adaptation. *Nat Rev Genet* 2008; **9**: 583–93.
- 711 88. Whitehead A, Crawford DL. Variation within and among species in gene expression □: raw  
712 material for evolution. *Mol Ecol* 2006; **15**: 1197–1211.
- 713 89. diCenzo GC, Benedict AB, Fondi M, Walker GC, Finan TM, Mengoni A, et al. Robustness

- 714 encoded across essential and accessory replicons of the ecologically versatile bacterium  
715 *Sinorhizobium meliloti*. *PLoS Genet* 2018; **14**.
- 716 90. diCenzo GC, Wellappili D, Golding GB, Finan TM. Inter-replicon Gene Flow Contributes to  
717 Transcriptional Integration in the *Sinorhizobium meliloti* Multipartite Genome.  
718 *G3&#58; Genes/Genomes/Genetics* 2018; **8**: g3.300405.2017.
- 719 91. Bell GDM, Kane NC, Rieseberg LH, Adams KL. RNA-Seq Analysis of Allele-Specific  
720 Expression, Hybrid Effects, and Regulatory Divergence in Hybrids Compared with Their  
721 Parents from Natural Populations. *Genome Biol Evol* 2013; **5**: 1309–1323.
- 722 92. Hochholdinger F, Hoecker N. Towards the molecular basis of heterosis. *Trends Plant Sci*  
723 2007; **12**: 427–432.
- 724
- 725

726 **Table 1. Significant DEGs** . The number of significant DEGs with respect to blank control (2-fold  
727 change in expression and an adjusted p-value  $\leq 0.01$ ) and the percentage with respect to the total  
728 number of genes is reported.  
729

|               | <b>Camporegio</b> | <b>Lodi</b> | <b>Verbena</b> | <b>Luteolin</b> |
|---------------|-------------------|-------------|----------------|-----------------|
| <b>1021</b>   | 516 (8.79%)       | 32 (0.55%)  | 506 (8.62%)    | 36 (0.61%)      |
| <b>AK83</b>   | 357 (5.84%)       | 66 (1.08%)  | 192 (3.14%)    | 60 (0.98%)      |
| <b>BL225C</b> | 1159 (19.33%)     | 76 (1.27%)  | 693 (11.56%)   | 149 (2.49%)     |
| <b>Hybrid</b> | 503 (8.38%)       | 98 (1.63%)  | 325 (5.41%)    | 52 (0.87%)      |

730

731



732 **Table 2.** Number of expressed genes that showed statistical evidence of each type of expression  
 733 pattern. Differential expression related to strain, condition, both strain and condition, or interaction  
 734 between strain and condition is reported. Percentages are calculated on the total number of DEGs.  
 735 Significance was based on an FDR-corrected p-value < 0.05.

736 \* Indicates whether the effect of the tested model on the expression of the gene is significant. A  
 737 gene can be associated to strain (gene differentially expressed only between strains), condition  
 738 (gene differentially expressed only between different conditions), strain and condition only (gene  
 739 differentially expressed in relation to strain and condition but not considering the full model strain x  
 740 condition), or be associated to the interaction between strain and condition (Strain x condition  
 741 column). This last situation can be due to significant association to the three tested models <sup>a</sup>, to the  
 742 full model and one of the others <sup>b, c</sup> or to the full model only <sup>d</sup>.

743

744

|                |                       | Groups of DEGs with significant association |             |                         |                       |                      |         |         |               | Total          |
|----------------|-----------------------|---------------------------------------------|-------------|-------------------------|-----------------------|----------------------|---------|---------|---------------|----------------|
|                |                       | Strain                                      | Condi<br>on | Strain and<br>condition | Strain x<br>condition |                      |         |         | None          |                |
| Mod<br>el      | Strain                | *                                           | -           | *                       | *                     | *                    | -       | -       | -             |                |
|                | Condition             | -                                           | *           | *                       | *                     | -                    | *       | -       | -             |                |
|                | Strain x<br>condition | -                                           | -           | -                       | *                     | *                    | *       | *       | -             |                |
| Number of DEGs |                       | 2028<br>(25%)                               | 87<br>(1%)  | 1201 (15%)              | 180<br>7 <sup>a</sup> | 43<br>6 <sup>b</sup> | 34<br>c | 24<br>d | 2417<br>(30%) | 8034<br>(100%) |
|                |                       |                                             |             |                         | 2301 (29%)            |                      |         |         |               |                |

745

746

747 **Table 3.** Selected COG categories over- or under-represented among the DEGs. Values represent  
 748 the log<sub>2</sub> fold change in abundance of genes annotated with the given COG category relative to the  
 749 amount expected by chance. Dashes indicate that the COG category is not statistically different than  
 750 chance in the given condition (significance threshold:  $p$ -value  $\leq 0.05$ ).

751

| COG Category        | Luteolin |        |      | Camporegio |        |       | Verbena |        |      | Lodi   |        |      |
|---------------------|----------|--------|------|------------|--------|-------|---------|--------|------|--------|--------|------|
|                     | Rm1021   | BL225C | AK83 | Rm1021     | BL225C | AK83  | Rm1021  | BL225C | AK83 | Rm1021 | BL225C | AK83 |
| Upregulated genes   |          |        |      |            |        |       |         |        |      |        |        |      |
| G                   | -        | -      | -    | -1.14      | -1.59  | -1.67 | -1.30   | -1.64  | -    | -      | -      | -    |
| J                   | -        | -      | -    | 2.81       | 0.92   | 2.50  | 2.80    | 1.16   | 1.81 | -      | -      | -    |
| N                   | -        | -      | -    | 4.19       | -      | -     | 4.25    | -      | -    | -      | -      | -    |
| O                   | -        | -      | 2.38 | 1.56       | 1.44   | 1.50  | 1.44    | 1.91   | 2.21 | -      | -      | 2.96 |
| Downregulated genes |          |        |      |            |        |       |         |        |      |        |        |      |
| C                   | -        | -      | -    | 1.88       | 0.88   | 1.74  | 1.89    | 1.11   | 1.79 | 2.71   | -      | -    |

752

753

754

755

756 **Figure 1.** Strain-by-plant variation of symbiosis-associated phenotypes. The number of rhizobium  
757 cells retrieved from plant roots (a), number of nodules per plant (b), epicotyl length (c), and the  
758 plant dry weight (d), are reported. Different colors (pink, orange, blue) indicate statistically  
759 significant groupings ( $p < 0.05$ ) based on a Scott-Knott test. For each condition, the dot indicate the  
760 mean value and the vertical lines link the maximum and minimum values.  
761

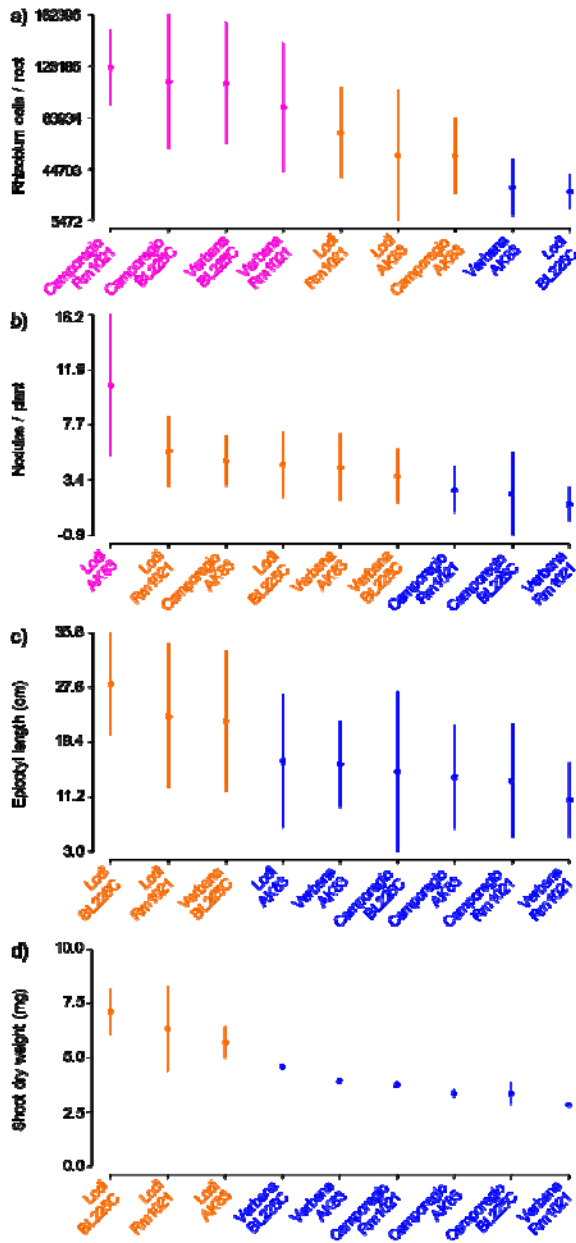

762

763

764

765 **Figure 2.** Plant root exudates have different metabolite composition. Principal Component Analysis  
766 of 2688 chemical features obtained from LC-MS of root exudates of the Verbena, Lodi, and  
767 Camporegio cultivars of alfalfa.

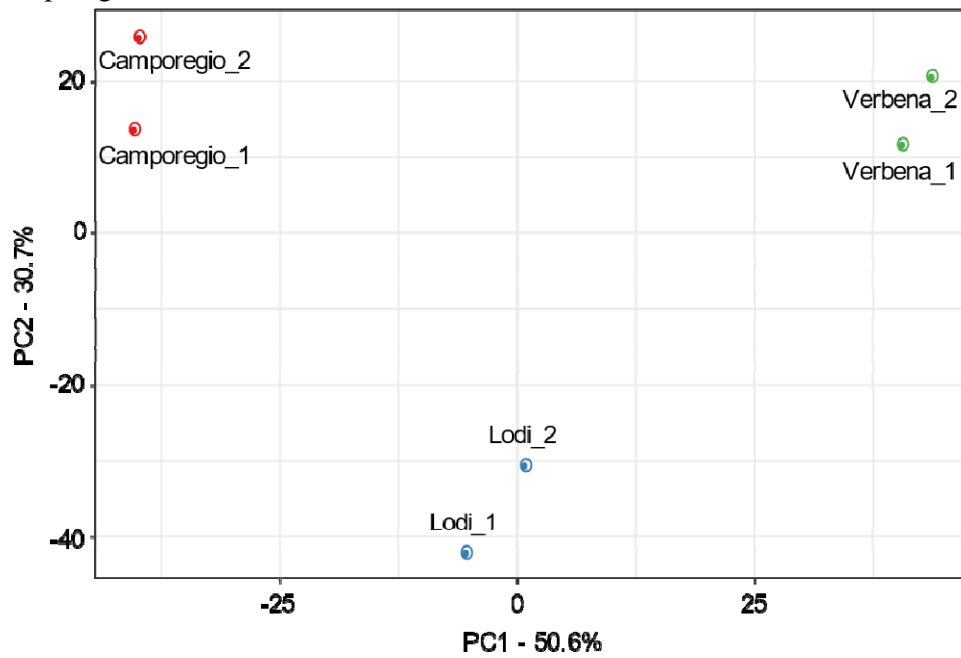

768

769

770

771

772

773

774

775

**Figure 3.** Cluster analysis of the stimulons for the four strains. Differentially expressed genes in each condition are on the columns. a) Rm1021, b) BL225C, c) AK83, d) hybrid strain. See **Supplemental Material file S1** for interactive heatmaps that have each column labelled with the corresponding locus tag

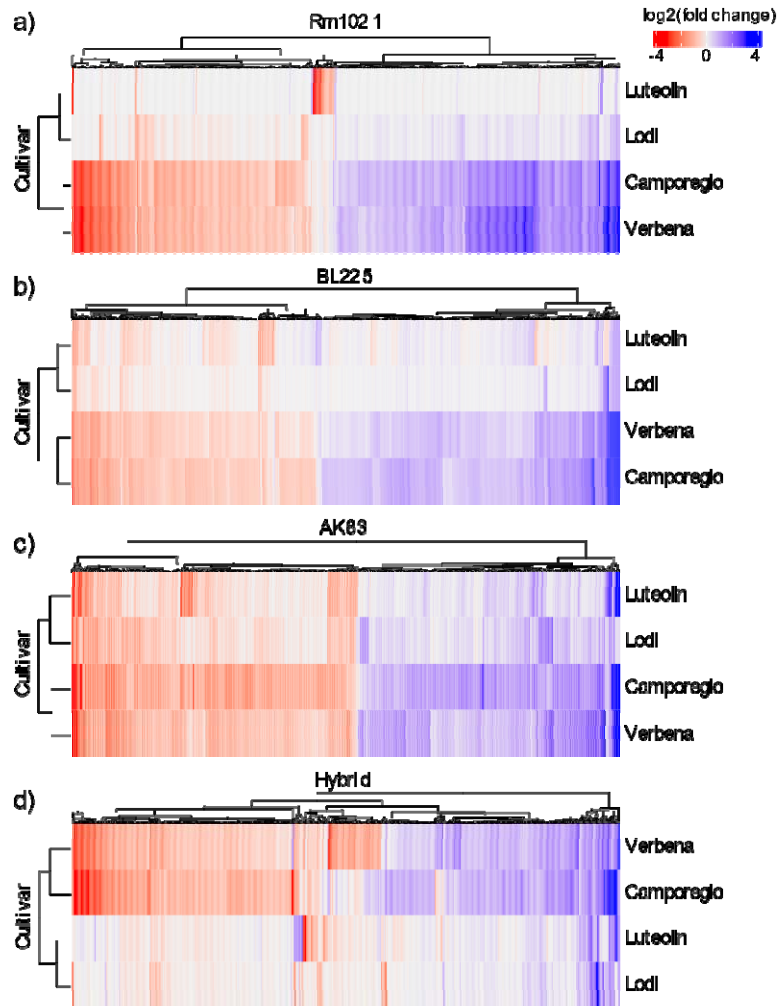

776

777

778

779

780

781

782

**Figure 4.** Cluster analysis of the stimulons of the shared set of orthologs. Differentially expressed genes in are on the columns. a) Luteolin, b) Verbena, c) Camporegio, d) Lodi. See **Supplemental Material file S1** for interactive heatmaps that have each column labelled with the corresponding locus tag.

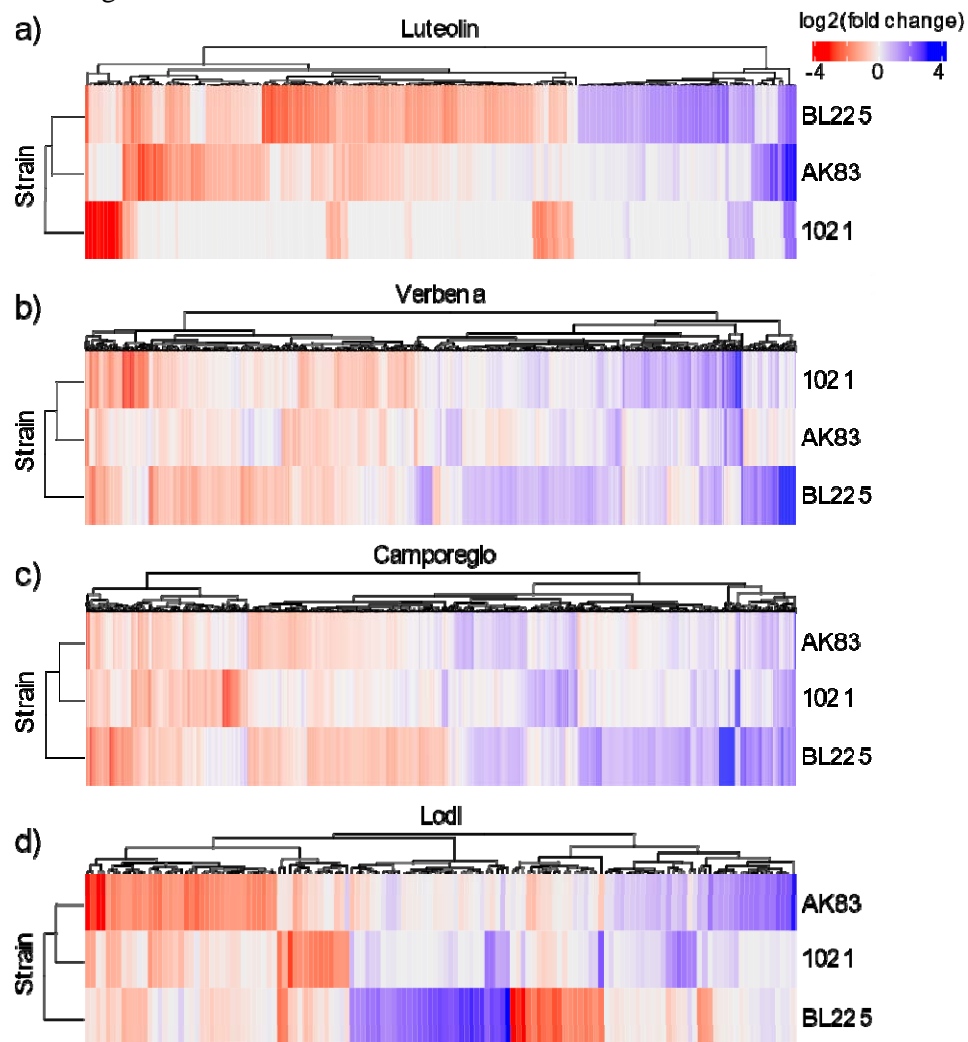

783

784



785

786 **Figure 5.** Clustering of the pSymA-hybrid strain with respect to the two parental ones (Rm1021  
787 and BL225C). Heatmaps based on DEGs of orthologous genes. a) Luteolin, b) Verbena, c)  
788 Camporegio, d) Lodi. See **Supplemental Material file S1** for interactive heatmaps that have each  
789 column labelled with the corresponding locus tag.

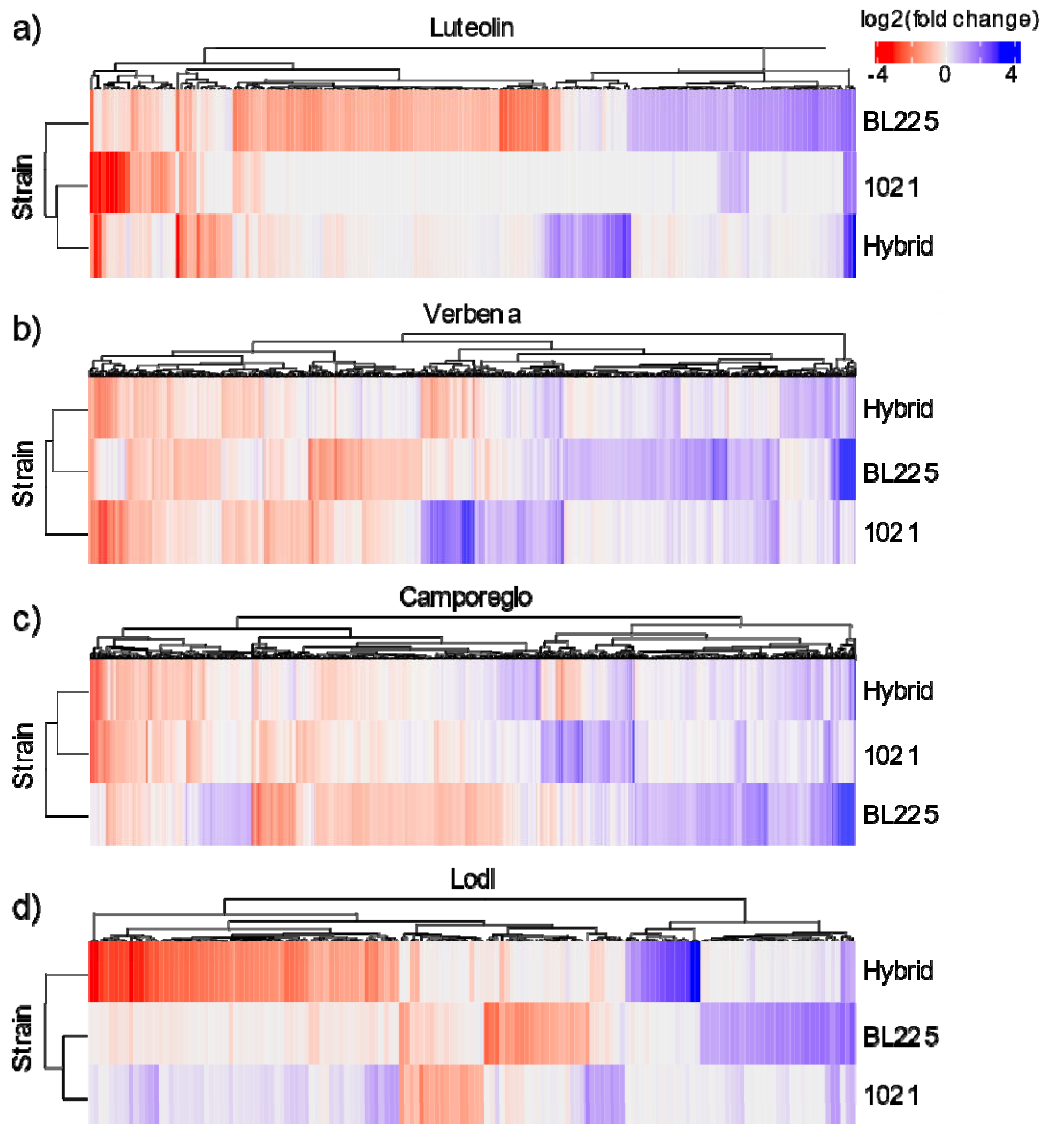

790

791

792 **Supplementary Material**

793

794 **Supplemental Material file S1.** Interactive heatmaps of the stimulons. A .zip folder containing  
795 .html files for detailed descriptions of Figures 3, 4 and 6.

796 **Supplemental Material file S2.** Functional categorization of DEGs. An Excel file containing four  
797 datasheets with KEGG and COG categories found in up and downregulated genes.

798

799 **Supplemental Material file S3.** A .zip archive containing the following tables and figures (see  
800 below)

801

802 **Supplementary tables**

803 **Table S1.** List of strains and alfalfa cultivars. .docx file.

804 **Table S2.** Primers used in this study. .docx file.

805 **Table S3.** List of LC-MS peaks. Excel file.

806 **Table S4.** Metabolites with the greatest differences among root exudates. Results of Simper  
807 analysis based on the decomposition of the Bray-Curtis dissimilarity obtained from each peak ID  
808 value .docx file.

809 **Table S5.** Chemical composition of root exudates from CHN analysis. .docx file.

810 **Table S6.** Significant differentially expressed genes (DEGs). .csv file.

811 **Table S7.** Overall number of DEGs in the strains by treatment combinations, their location on the *S.*  
812 *meliloti* replicons and up and downregulation with respect to blank control. Excel file.

813 **Table S8.** Results of quantitative RT-PCR on selected genes. .docx file.

814 **Table S9.** Pangenome ortholog assignment from Roary. .csv file.

815

816 **Supplementary Figures**

817

818 **Figure S1.** Symbiosis-associated phenotypes. The number of rhizobium cells retrieved from plant  
819 roots (a), number of nodules per plant (b), epicotyl length (c), and the plant dry weight (d), are  
820 reported. Letters indicate groupings based on Tukey contrasts ( $p < 0.05$ ). Error bars indicate one  
821 standard deviation. .png file

822 **Figure S2.** Plot of Principal Component Analysis from LC-MS of root exudates of the Verbena,  
823 Lodi and Camporegio cultivars of alfalfa, including the blank control. .png file

824

825
